# Supplementary material for: Investigating associations between JAK inhibition and venous thromboembolism by systematic mining of large-scale datasets
Source: Springer Nature journal article supplement (doi:10.1007/s10787-025-01677-2), 2025-02-24

# Supplementary Figure 1

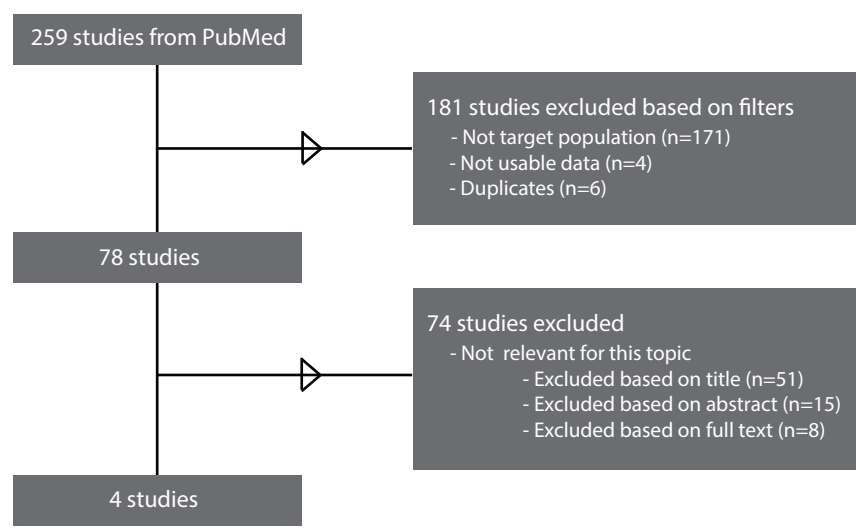

Supplement: MOESM1 [file 10787_2025_1677_MOESM1_ESM.pdf]
